# Supplementary material for: Perceptions, Experiences, and Priorities Supporting Agro-Ecosystem Management Decisions Differ among Agricultural Producers, Consultants, and Researchers
Source: Preprints.org preprint supplement (doi:10.20944/preprints201810.0176.v1), 2018-10-09
Supplement: Supplementary file 1 [file supplementary]

Table S1. Survey utilized to assess context, knowledge, experiences, and perceptions regarding environmental conditions, management practices, production challenges, and research needs of agricultural stakeholders in Montana, USA.

| Question                                                                           | Dataset         |
|------------------------------------------------------------------------------------|-----------------|
| What county(ies) do you primarily operate in?                                      | Multiple choice |
| How long have you been in your agricultural profession?                            | Multiple choice |
| What type of agricultural systems do you work in?                                  | Multiple choice |
| What is the average number of acres of the systems on which you operate?           | Multiple choice |
| How much rainfall does your area of operation receive annually?                    | Multiple choice |
| Do you use any type of tillage?                                                    | Multiple choice |
| Rank the crop that you have observed are the easiest to produce                    | Multiple choice |
| What factor influence yields most?                                                 | Multiple choice |
| Describe the crop rotation you most commonly use                                   | Multiple choice |
| Do you recommend a green manure (cover crop) as part of your rotation?             | Multiple choice |
| Please list the crops you incorporate or recommend in a green manure               | Multiple choice |
| How much cropland do you recommend                                                 | Multiple choice |
| Do you think green manure compromises soil moisture and nutrient availability?     | Multiple choice |
| Would you recommend incorporating livestock to manage green manure/cover crops?    | Multiple choice |
| What crops are most influenced by weeds?                                           | Multiple choice |
| What are your ten most problematic weeds and how difficult are they to manage?     | Multiple choice |
| Would you recommend incorporating livestock to manage weeds?                       | Multiple choice |
| What crops are influenced the most by disease?                                     | Multiple choice |
| What are your five most problematic diseases and how difficult are they to manage? | Multiple choice |
| What are your five most problematic insects and how difficult are they to manage?  | Multiple choice |
| How frequently do you test you soil or recommend soil testing?                     | Multiple choice |
| How many fields do you soil test or recommend soil testing each year?              | Multiple choice |
| Which crops do you feel face the biggest challenge to market?                      | Multiple choice |
| What crops are influences the most by insects?                                     | Multiple choice |
| Do you use or recommend soil fertility test?                                       | Multiple choice |
| What is the most challenging agricultural issue you deal with?                     | Open-Ended      |
| What factors influence your choice of crop rotations most?                         | Open-Ended      |
| What weed research do you feel is most needed?                                     | Open-Ended      |
| What disease research do you feel is most needed?                                  | Open-Ended      |
| What insect research do you feel is most need?                                     | Open-Ended      |
| What factors determine whether you add or recommend adding fertilizer?             | Open-Ended      |
| What soil fertility research do you feel is most needed?                           | Open-Ended      |
| What marketing research do you feel is most needed?                                | Open-Ended      |
| What are your experiences with no-till?                                            | Open-Ended      |
| What research do you feel would be the most beneficial to your operation?          | Open-Ended      |
| Where do you get your farming information?                                         | Open-Ended      |
| Please describe any on-farm research you are conducting?                           | Open-Ended      |

Table S2. Domains (underlined) and subdomains used to identify recurring themes in open-ended questions of the survey utilized to assess context, knowledge, experiences, and perceptions regarding environmental conditions, management practices, production challenges, and research needs of agricultural stakeholders in Montana, USA.

*Question: What is the most challenging agricultural issue you deal with?*

| <b>Domains and subdomains</b>                                                                           | <b>Codes</b> |
|---------------------------------------------------------------------------------------------------------|--------------|
|                                                                                                         |              |
| <u>Economic</u>                                                                                         | ec           |
| Costs (e.g., price of fertilizer or labor wages)                                                        | cost         |
| Marketing (e.g., finding a distributor or bulk buyer)                                                   | mark         |
| Production (e.g., producing a sellable crop)                                                            | pro          |
| Losses (e.g., yield losses to a pest)                                                                   | loss         |
| Time (e.g., having enough time to implement desired management regime)                                  | tim          |
|                                                                                                         |              |
| <u>Social</u>                                                                                           | soc          |
| Personal Relationship (e.g., neighbors' judgments prevent producer from using a new agronomic practice) | pr           |

|                                                                                                                                            |      |
|--------------------------------------------------------------------------------------------------------------------------------------------|------|
| Policy and Regulation (e.g., constraint of crp prevent more intensive pest management)                                                     | pol  |
| Knowledge/Research (e.g., producer doesn't know how to best manage a pest)                                                                 | kno  |
| Labor Personnel (e.g., producer has to train farm workers every year because turn over is high)                                            | lab  |
| Communication (e.g., A researcher feel his/her recommendations fall on deaf ears)                                                          | com  |
| Sustainability (e.g., A producer has a hard time getting acceptable yield while minimizing deleterious impacts on surrounding environment) | sust |
| Land ownership (e.g., A producer lease his/her land and is constrained by the management regime of the land owner)                         | land |
|                                                                                                                                            |      |
| <u>Agroecological</u>                                                                                                                      | agec |
| Weeds (e.g., managing Bromus tectorum)                                                                                                     | weed |
| Phytophagous Insects (e.g, wheat stem sawfly)                                                                                              | ins  |
| Pathogens (e.g., managing wheat streak mosaic virus)                                                                                       | path |
| Pollinators (e.g., attracting enough pollinators to obtain acceptable yields of bee pollinated crops)                                      | poll |
| Vertebrate herbivores (e.g., Deer, gophers)                                                                                                | herb |

|                                                                                                    |      |
|----------------------------------------------------------------------------------------------------|------|
| Natural Enemies (e.g., parasitoids and predators of alfalfa weevil)                                | enm  |
| Crop plant physiology, health and quality (e.g., leaf area index, canopy height, assimilation)     | crop |
| Evolved Resistance to pesticides (e.g., managing multiple herbicide resistant <i>Avena fatua</i> ) | res  |
|                                                                                                    |      |
| <u>Environmental</u>                                                                               | Env  |
| Soil Properties (available nutrient content, CEC, texture, porosity, organic matter, compaction)   | soil |
| Climatic factors (e.g, growing degree days, precipitation, elevation)                              | clim |
| Natural Disturbances (e.g., hail, windstorms, flooding, fire)                                      | dist |
| Nutrient Cycling (e.g. C:N in cover crops, nutrient uptake, leaching etc)                          | nut  |
| Hydrologic factors (e.g., moisture, evapotranspiration, precipitation)                             | hyd  |
|                                                                                                    |      |
| <u>Agronomy and management</u>                                                                     | Mgt  |
| Rotations/Crop Diversity (e.g., finding a good rotation to break pest cycles)                      | rot  |

|                                                                                                                                  |      |
|----------------------------------------------------------------------------------------------------------------------------------|------|
| Fertility (e.g., adding enough fertilizer to provide adequate yields)                                                            | fert |
| Equipment (e.g., having the proper machinery to manage efficiently)                                                              | eqp  |
| Pesticides (e.g., avoiding residual effects of a synthetic auxin like 2,4-D)                                                     | pest |
| Irrigation (e.g., Having to water his or her crop and getting appropriate water rights)                                          | irr  |
| Tillage (e.g., trying to time soil cultivation to minimize erosion)                                                              | till |
| Fallowing (e.g., balancing the need to fallow to increase soil moisture with avoiding erosion or weed infestations)              | fall |
| Seeding/Propagation (e.g., farmer has difficulty seeding following no-till because surface soil has high penetration resistance) | seed |
| Labor Intensity (e.g., managing a weed mechanically on an organic veggie farm requires too much work)                            | int  |
| Legacies/history (e.g., by not fallowing for two years not enough soil moisture to grow a cover crop)                            | leg  |
| Controlled burns (e.g., farmer can't get proper conditions to burn crop residue)                                                 | burn |
| Yield (e.g., managing pests and fertility to achieve acceptable yields)                                                          | yld  |
| Crop varieties (e.g., buy wheat seeds that will resist wheat stem sawfly infestations)                                           | var  |
| Acreage (e.g., having too much or too little land to perform a desire practice)                                                  | acre |

|                                                                                                                                                 |      |
|-------------------------------------------------------------------------------------------------------------------------------------------------|------|
| Specific inputs (e.g., farmer has hard time rotating modes of action to avoid selecting for resistance while getting acceptable weed mortality) | inpt |
| Timing (e.g., seeding early enough to accumulate necessary degree-days)                                                                         | tmng |
| Processing (e.g., farmer can't get equipment to clean seeds in a timely fashion)                                                                | pres |

*Question: What factors influence your choice of crop rotations most?*

| <b>Domains and subdomains</b>                                                   | <b>Codes</b> |
|---------------------------------------------------------------------------------|--------------|
|                                                                                 |              |
| <u>Economic</u>                                                                 | ec           |
| Costs (e.g., some seeds are too expensive to buy and plant many years in a row) | cost         |
| Marketing (e.g., price per bushel a producer can get for a crop)                | mark         |
| Production (e.g., yield potential given crop, fertility, and moisture)          | pro          |
| Losses (e.g., amount of yield lost to pests)                                    | loss         |
| Time (e.g., having enough time to implement desire management regime)           | tim          |
| Contracts (e.g., bound by a future contract or land owner contract if renting)  | cntc         |

|                                                                                                                                         |      |
|-----------------------------------------------------------------------------------------------------------------------------------------|------|
|                                                                                                                                         |      |
| <u>Social</u>                                                                                                                           | soc  |
| Personal Relationship (e.g., follows neighbors do)                                                                                      | pr   |
| Policy and Regulation (e.g., plant based on rules for organic certification)                                                            | pol  |
| Knowledge/Research (e.g., producer's experience leads him/her to select best crops)                                                     | kno  |
| Labor Personnel (e.g., availability of farm workers to plant or harvest)                                                                | lab  |
| Communication (e.g., a consultant recommends a rotation to a grower)                                                                    | com  |
| Habits/goals (e.g., grower always grows the same things in the same rotation no matter what)                                            | hab  |
| Sustainability (e.g., producer plant crops to avoid adverse environmental effects)                                                      | sust |
|                                                                                                                                         |      |
| <u>Agroecological</u>                                                                                                                   | agec |
| Weeds (e.g., producer plant smother crop to manage canada thistle)                                                                      | weed |
| Phytophagous Insects (e.g., producer grows two years of oilseed and pulse crops following wheat to keep wheat stem sawfly pressure low) | ins  |

|                                                                                                                                                   |      |
|---------------------------------------------------------------------------------------------------------------------------------------------------|------|
| Pathogens (e.g., producer fallows to avoid green bridge for wheat curl mite)                                                                      | path |
| Crop plant physiology, health and quality (e.g., leaf area index, canopy height, assimilation)                                                    | crop |
| Evolved Resistance to pesticides (e.g., producer plants a cereal grain to avoid spraying EPSP inhibitors, thus reducing selection for resistance) | res  |
|                                                                                                                                                   |      |
| <u>Environmental</u>                                                                                                                              | env  |
| Soil Properties (e.g., penetration resistance, texture, CEC)                                                                                      | soil |
| Climatic factors (e.g., growing degree day accumulation)                                                                                          | clim |
| Nutrient Biogeochemistry (e.g., producer plants legume to fix N)                                                                                  | nut  |
| Hydrologic factors (e.g., soil moisture, precipitation)                                                                                           | hyd  |
| Geography (e.g., producer is growing at high elevation)                                                                                           | geo  |
|                                                                                                                                                   |      |
| <u>Management</u>                                                                                                                                 | mgt  |
| Fertility (e.g., nutrient content of soil)                                                                                                        | fert |



|                                                                                                                     |       |
|---------------------------------------------------------------------------------------------------------------------|-------|
| Equipment (e.g., having the right seed drill to plant desired crop)                                                 | eqp   |
| Pesticides (e.g., what herbicides are available to the producer)                                                    | pest  |
| Irrigation (e.g., having water rights to meet irrigation needs)                                                     | irr   |
| Tillage (e.g., a producer decides what to plant on whether or not he/she could till)                                | till  |
| Fallowing (e.g., a producer plants a less water use efficient crop because he/she was able to fallow previous year) | fall  |
| Seeding/Propagation (e.g., what is easiest to seed is what a producer grows)                                        | seed  |
| Labor Intensity (e.g., a grower chooses his/her crop based on farm workers available)                               | int   |
| Legacies/history (e.g., a grower plants his/her crops based on what he/she grew last year)                          | leg   |
| Livestock Integration (e.g., a grower plants according to his/her livestock feed needs)                             | live  |
| Crop residue management (e.g., a grower plants what grows most easily through a dense layer of thatch)              | resid |
| Crop rotation (e.g., what year it is in a predetermined crop rotation)                                              | rot   |
| Cover crops (e.g., planting a cover crop to prevent erosion or enhance soil nutrient status)                        | cov   |

**Question: What weed research do you feel is most needed?**

| <b>Domains and subdomains</b>                                             | <b>Codes</b> |
|---------------------------------------------------------------------------|--------------|
|                                                                           |              |
| <u>Specific Species or Functional Groups</u>                              | spec         |
| Monocots (grasses, rushes, sedges)                                        | monc         |
| Dicots (broadleaf species)                                                | dico         |
| Kochia ( <i>Bassia scoparia</i> )                                         | kosc         |
| Canada thistle/creeping thistle ( <i>Cirsium arvense</i> )                | ciar         |
| Cheat/cheatgrass/downy brome ( <i>Bromus tectorum</i> )                   | brte         |
| Field bindweed/morning glory/creeping jenny ( <i>Convulvus arvensis</i> ) | coar         |
| Blue lettuce ( <i>Lactuca tartarica</i> )                                 | lata         |
| Prickly lettuce ( <i>Lactuca serriola</i> )                               | lase         |
| Foxtail barley ( <i>Hordeum jubatum</i> )                                 | hoju         |
| Prairie junegrass ( <i>Koeleria macrantha</i> )                           | koma         |

|                                                       |      |
|-------------------------------------------------------|------|
| Pigeon grass/Green foxtail ( <i>Setaria viridis</i> ) | sevi |
| Hoary cress/whitetop ( <i>Lepidium draba</i> )        | ledr |
| Hoary alyssum ( <i>Berteroa incana</i> )              | bein |
| Quackgrass ( <i>Elymus repens</i> )                   | elre |
| Hounds tongue ( <i>Cynoglossum officinale</i> )       | cyof |
| Wild oat ( <i>Avena fatua</i> )                       | avfa |
| Jointed goatgrass ( <i>Aegilops cylindrica</i> )      | aecy |
| Leafy spurge/spurge ( <i>Euphorbia escula</i> )       | eues |
| Narrowleaf hawksbeard ( <i>Crepis tectorum</i> )      | crte |
| Knapweed ( <i>Centaurea</i> sp.)                      | cent |
| Oxeye daisy ( <i>Leucanthemum vulgare</i> )           | levu |
| Mare's tail ( <i>Conzya canadensis</i> )              | coca |
| MT noxious weeds (state listed)                       | mtno |

|                                                                              |      |
|------------------------------------------------------------------------------|------|
| Persian darnel ( <i>Lolium persicum</i> )                                    | lope |
| Chickweed ( <i>Stellaria media</i> )                                         | stme |
| Ryegrass ( <i>Lolium multiflorum</i> )                                       | lomu |
| Perennial weeds                                                              | pern |
| Annual weeds                                                                 | ann  |
| Biennial weed                                                                | bi   |
| Bulbous bluegrass ( <i>Poa bulbosa</i> )                                     | pobu |
|                                                                              |      |
| <u>Integrated Pest (Weed) Management</u>                                     | ipm  |
| Cultural control (e.g., crop rotations, and cover cropping)                  | cult |
| Mechanical control (e.g., mowing and tillage)                                | mech |
| Prevention (e.g., reducing seed rain; increased density dependent mortality) | prev |
| Unspecified IPM                                                              | uipm |

|                                                                                                                                         |      |
|-----------------------------------------------------------------------------------------------------------------------------------------|------|
|                                                                                                                                         |      |
| <u>Biological Control</u>                                                                                                               | ctrl |
| Conservation (e.g, creating habitat for native seed predators)                                                                          | cons |
| Classical (e.g., introducing a parasite from an invasive plant's native range notnative)                                                | clas |
| Inundative/augmentative (e.g., culturing and spreading spores of a native seed pathogen)                                                | aug  |
| Livestock integration (e.g., allowing sheep to graze an infestation of Euphorbia escula)                                                | live |
| Unspecified biological control                                                                                                          | unbc |
|                                                                                                                                         |      |
| <u>Herbicides</u>                                                                                                                       | herb |
| Altering modes of action (e.g., using an epsp inhibitor like glyphosate one year; then a synthetic auxin like clopyralid the next year) | mode |
| New chemistries (e.g., finding an herbicide that denatures rubisco)                                                                     | chem |
| Resistance (e.g., surviving applications of als inhibitors)                                                                             | evol |
| Efficacy (e.g., what is the percent control on a specific weed of a new herbicide?)                                                     | eff  |

|                                                                                                                                        |       |
|----------------------------------------------------------------------------------------------------------------------------------------|-------|
| Residues (e.g., what is the leaching potential of a new herbicide, impact on next crop based on persistence)                           | resid |
| Herbicide use                                                                                                                          | use   |
| Alternatives to synthetic pesticides                                                                                                   | alt   |
|                                                                                                                                        |       |
| <u>Biology</u>                                                                                                                         | biol  |
| Physiology (e.g., how does a particular species metabolize a certain mode of action?)                                                  | phys  |
| Demography/population ecology (e.g., by reducing seed rain a certain percentage, how will the density of a particular species change?) | pop   |
| Communities (i.e., can a particular land management practice favor a more desirable assemblage of species?)                            | comm  |
| Phenology (e.g., will a particular species emerge earlier in the season under predicted climate change?)                               | phen  |
| Landscape ecology/dispersal (e.g., what is the best management practice to minimize the spatial spread of a weed?)                     | disp  |
| Basic research (e.g., how is a particular species pollinated?)                                                                         | bas   |
| Ecosystem ecology (e.g., nutrient cycling, climate change impacts)                                                                     | ecos  |
| Applied research (e.g., what is the best practice to control <i>B. tectorum</i> in pulse crops?)                                       | appl  |

|                                                                       |      |
|-----------------------------------------------------------------------|------|
|                                                                       |      |
| <u>Agronomic</u>                                                      | agro |
| Genetically Engineering/Transgenic (e.g., Glyphosate resistant crops) | tran |
| Yield losses (e.g., competitive exclusion by weeds)                   | loss |
| Competitive Cultivars (e.g., breeding taller varieties of wheat)      | var  |
| Grains                                                                | grn  |
| Vegetables                                                            | veg  |
| Pulses (legumes, eg peas chickpeas lentils)                           | pul  |
| Fruit                                                                 | frt  |
| Oilseed                                                               | oil  |
| Forage/range                                                          | for  |
| Management time                                                       | tim  |
|                                                                       |      |

|                                                                                                                                                               |       |
|---------------------------------------------------------------------------------------------------------------------------------------------------------------|-------|
| <u>Economic</u>                                                                                                                                               | ec    |
| Thresholds (i.e., at what density of a particular weed does yield loss warrant management?)                                                                   | thrsh |
| Cost/Benefit analyses (e.g., does non-target mortality to pollinators or natural enemies outweigh the reduction in weed pressure from the use of herbicides?) | cba   |
|                                                                                                                                                               |       |
| <u>Social</u>                                                                                                                                                 | soc   |
| Sustainability                                                                                                                                                | sus   |
| Education/outreach                                                                                                                                            | edu   |
|                                                                                                                                                               |       |

*Question: What disease research do you feel is most needed?*

| <b>Domains and subdomains</b>                             | <b>Codes</b> |
|-----------------------------------------------------------|--------------|
|                                                           |              |
| <u>Specific Diseases or Disease Classes</u>               | spec         |
| <i>Fusarium</i> (including snow mold, unspecified blight) | fus          |



|                                                  |      |
|--------------------------------------------------|------|
| Ascochyta                                        | asc  |
| Tan spot ( <i>Pyrenophora tritici-repentis</i> ) | tan  |
| Wheat streak mosaic virus                        | wsmv |
| Rust ( <i>Puccinia</i> sp.)                      | wsr  |
| <i>Cercospora</i> /leaf spot                     | cerc |
| Unspecified root rot                             | root |
| Rhizoctonia                                      | rhiz |
| Aphanomyces/root rot                             | aph  |
| Smut/tilletia                                    | smut |
| Soil-borne (including root)                      | sb   |
| Fungal                                           | fung |
| Viral                                            | vir  |
| Foliar                                           | fol  |

|                                                                                                   |       |
|---------------------------------------------------------------------------------------------------|-------|
| Scab (streptomyces-on tubers)                                                                     | scab  |
| Net blotch (net form net blotch)                                                                  | nfnb  |
| Crown diseases                                                                                    | crwn  |
| Powdery mildew                                                                                    | powm  |
| Seed born                                                                                         | seed  |
| Alternaria                                                                                        | alta  |
|                                                                                                   |       |
| <u>Management</u>                                                                                 | man   |
| Cultural control (e.g., crop rotations, and cover cropping, timing (when to plant, fertilize etc) | cult  |
| Resistant crop varieties                                                                          | var   |
| Biocontrol                                                                                        | bio   |
| Fungicides                                                                                        | fcide |
| Alternatives to pesticides                                                                        | alt   |

|                                                                                             |       |
|---------------------------------------------------------------------------------------------|-------|
| Reducing non target effects                                                                 | red   |
| IPM                                                                                         | ipm   |
|                                                                                             |       |
| <u>Ecological</u>                                                                           | ecol  |
| Vectors (organisms that transmit a disease from one individual to another)                  | vect  |
| Landscape ecology/dispersal                                                                 | disp  |
| Green bridge (reservoirs of disease propagules)                                             | gb    |
| soil ecology (e.g., how bacteria interact in soil to influence root rot occurrences)        | soec  |
| abiotic                                                                                     | abio  |
| evolved resistance                                                                          | evol  |
|                                                                                             |       |
| <u>Economic</u>                                                                             | ec    |
| Thresholds (i.e., at what density of a particular weed does yield loss warrant management?) | thrsh |

|                                                                                                                                                               |      |
|---------------------------------------------------------------------------------------------------------------------------------------------------------------|------|
| Cost/Benefit analyses (e.g., does non-target mortality to pollinators or natural enemies outweigh the reduction in weed pressure from the use of herbicides?) | cba  |
| Yields (loss or increase)                                                                                                                                     | yld  |
| Marketing                                                                                                                                                     | mark |
|                                                                                                                                                               |      |
| <u>Specific Crops</u>                                                                                                                                         | crop |
| Alfalfa                                                                                                                                                       | alf  |
| Wheat                                                                                                                                                         | wht  |
| Barley                                                                                                                                                        | bar  |
| Chickpeas/garbonzo beans                                                                                                                                      | garb |
| Lentils                                                                                                                                                       | len  |
| Unspecified pulses                                                                                                                                            | puls |
| Peas                                                                                                                                                          | pea  |
| Millet                                                                                                                                                        | mil  |

|                            |      |
|----------------------------|------|
| Potatoes                   | pot  |
| Grains (unspecified)       | grn  |
| Vegetables                 | veg  |
| Lettuce                    | let  |
| Greenhouse crops           | grnh |
| Varieties (more resistant) | var  |
| Soybean                    | soy  |
| Solanaceae                 | sola |
| Cucurbitaceae              | cucu |
|                            |      |
| <u>Social</u>              | soc  |
| Communication/education    | edu  |
|                            |      |

|                          |      |
|--------------------------|------|
| <u>Other</u>             | othe |
| No problems with disease | nopr |

*Question: What insect research do you feel is most need?*

| <b>Domains and subdomains</b>                                                                 | <b>Codes</b> |
|-----------------------------------------------------------------------------------------------|--------------|
|                                                                                               |              |
| <u>Specific Insects Pests</u>                                                                 | spec         |
| Sawflies (Hymenoptera:Symphyta)                                                               | sym          |
| weevils (Coleoptera:Curculionidae)                                                            | cur          |
| Wireworm/click beetles (Coleoptera:Elateridae)                                                | ela          |
| Aphids (Hemiptera:Aphidae)                                                                    | aph          |
| Armyworms/cutworms/owlet moths/cabbage worms (a.k.a. cabbage loopers) (Lepidoptera:Noctuidae) | noc          |
| Flea beetles (Coleoptera:Chrysomelidae)                                                       | chry         |

|                                                                           |      |
|---------------------------------------------------------------------------|------|
| Midges (Diptera:Cecidomyiidae)                                            | cec  |
| Grasshoppers/locusts (Orthoptera:Acrididae)                               | acr  |
| Leafhoppers/hoppers (Hemiptera:Cicadellidae)                              | cic  |
| Lygus bugs (Hemiptera:Lygidae)                                            | lyg  |
| Leaf miners (Diptera, Lepidoptera, Hymenoptera larvae)                    | mine |
| Mites e.g., spider mite; wheat curl mite (Arachnida:Acari)                | acri |
| Onion and root maggots (Diptera:Anthomyiidae)                             | anth |
| Mosquitoes (Diptera:Culicidae)                                            | culi |
| Symphyla (Centipedes)                                                     | sphl |
| New pests                                                                 | npst |
|                                                                           |      |
| <u>Beneficial Insects</u>                                                 | Ben  |
| Natural enemies (i.e., parasitoids and predators of phytophagous insects) | nat  |

|                           |      |
|---------------------------|------|
| Pollinators               | Poll |
| Unspecified beneficial    | Unbe |
|                           |      |
| <u>Specific Crops</u>     | Crop |
| Wheat                     | Wht  |
| Barley                    | Bar  |
| Chickpeas/garbonzo beans  | garb |
| Lentils                   | len  |
| Peas                      | pea  |
| Sunflowers                | hean |
| Millet                    | mil  |
| Potatoes                  | pot  |
| Pulses/legumes (Fabaceae) | leg  |



|                                                                                                                                                                 |       |
|-----------------------------------------------------------------------------------------------------------------------------------------------------------------|-------|
| Grains                                                                                                                                                          | grn   |
| Vegetables                                                                                                                                                      | veg   |
| Lettuce                                                                                                                                                         | let   |
| Hay                                                                                                                                                             | hay   |
|                                                                                                                                                                 |       |
| <u>Economic</u>                                                                                                                                                 | ec    |
| Thresholds (i.e., at what density of a particular weed does yield loss warrant management?)                                                                     | thrsh |
| Cost/Benefit analyses (e.g., does non-target mortality to pollinators or natural enemies outweigh the reduction in pest pressure from the use of insecticides?) | cba   |
| Effects on yields (i.e., loss or gain in crop yields)                                                                                                           | yld   |
|                                                                                                                                                                 |       |
| Integrated pest management                                                                                                                                      | ipm   |
| Cultural control (e.g., crop rotations, and cover cropping)                                                                                                     | cult  |
| Mechanical controls (e.g., tillage)                                                                                                                             | mech  |

|                                                                                                             |       |
|-------------------------------------------------------------------------------------------------------------|-------|
| Resistant crop varieties                                                                                    | var   |
| Classical biocontrol (any organism including insects introduced to control a plant-eating pest)             | bio   |
| Prevention                                                                                                  | prv   |
| Insecticides                                                                                                | icide |
| Alternatives to pesticides                                                                                  | alt   |
| Reducing non-target effects                                                                                 | red   |
| Conservation biocontrol (altering management regime to enhance predation or parasitism on pests)            | cbc   |
| Unspecified IPM                                                                                             | uipm  |
| Transgenic crops / GMOs                                                                                     | gmo   |
| Fertility (e.g., avoiding overfertilizing so plants invest in secondary metabolites)                        | fert  |
|                                                                                                             |       |
| <u>Ecological effects</u>                                                                                   | ecol  |
| Demography/populations (estimating the density of a particular species given a set of management practices) | pop   |

|                                                                                    |      |
|------------------------------------------------------------------------------------|------|
| Landscape and dispersal (spatial and temporal dynamics of crops, pest and enemies) | land |
| Communities                                                                        | comm |
| Evolved resistance                                                                 | evol |
| Abiotic factors                                                                    | abio |

*Question: What factors determine whether you add or recommend adding fertilizer?*

| <b>Domains and subdomains</b>                  | <b>Codes</b> |
|------------------------------------------------|--------------|
|                                                |              |
| <u>Economic</u>                                | ec           |
| Input costs                                    | cost         |
| Marketability (producing a crop that can sell) | mark         |
| Product availability                           | avl          |
| Yield losses                                   | loss         |
| Land ownership (own or lease)                  | land         |

|                                                                                                            |      |
|------------------------------------------------------------------------------------------------------------|------|
| Labor intensity/time                                                                                       | time |
|                                                                                                            |      |
| <u>Agronomic (inputs and outputs of agriculture)</u>                                                       | agro |
| Desired yield                                                                                              | yld  |
| Legacy effects/history (e.g., was the field fertilized in previous season; what crop was grown previously) | leg  |
| Soil test/soil chemistry                                                                                   | test |
| Plant tissue test                                                                                          | tiss |
| Crop/ crop rotation/fallow (what's growing now/in future)                                                  | crop |
| Protein/nutritive quality                                                                                  | pro  |
| Equipment                                                                                                  | eqp  |
| Management system (e.g., convention vs. organic)                                                           | mgt  |
| Precision agriculture                                                                                      | prag |
| Irrigation                                                                                                 | irr  |

|                                       |       |
|---------------------------------------|-------|
| None added/don't fertilize            | none  |
|                                       |       |
| <u>Environmental and agroecology</u>  | env   |
| Precipitation/moisture                | mstr  |
| Plant community                       | comm  |
| Leaching potential/volatilization     | lch   |
| Soil physical properties (texture)    | spp   |
|                                       |       |
| <u>Social</u>                         | soc   |
| Knowledge/experience and lack thereof | kno   |
| Habit                                 | hab   |
| Short and long term goals             | goals |
| Recommendations                       | rec   |

|                |      |
|----------------|------|
| Sustainability | sust |
|----------------|------|

*Question: What soil fertility research do you feel is most needed?*

| <b>Domains and subdomains</b> | <b>Codes</b> |
|-------------------------------|--------------|
|                               |              |
| <u>Economic</u>               | ec           |
| Input costs                   | cost         |
| Yield losses                  | loss         |
| International trade           | trd          |
| Return on investment (ROI)    | roi          |
|                               |              |
| <u>Agronomic</u>              | agro         |
| Legacy effects/history        | leg          |
| Cover crop/green manure       | cov          |

|                                                                               |      |
|-------------------------------------------------------------------------------|------|
| Crop/ crop rotation                                                           | crop |
| Management system (e.g., convention vs. organic)                              | mgt  |
| Precision agriculture                                                         | pag  |
| Specific inputs (a product such as anhydrous ammonia or potash - fertilizers) | inp  |

*Question: What marketing research do you feel is most needed?*

| <b>Domains and subdomains</b>                            | <b>Codes</b> |
|----------------------------------------------------------|--------------|
|                                                          |              |
| <u>Revenue streams</u>                                   | sell         |
| Locating buyers                                          | buy          |
| New markets (e.g., selling Pardina lentils to Spain)     | nmrk         |
| Market niche (e.g., targeting farm-to-table restaurants) | nch          |
| Pricing                                                  | pric         |

|                                                                                  |      |
|----------------------------------------------------------------------------------|------|
| Prediction                                                                       | pdct |
| Diversification (of product)                                                     | div  |
| Future/Forward Contracts and stockmarket bullshit                                | con  |
| Ecosystem services (e.g., carbon sequestration, water purification, pollination) | esrv |
| Seasonality                                                                      | seas |
| Commodity                                                                        | cmd  |
| Alternative/specialty                                                            | alt  |
| Barley                                                                           | bar  |
| Camelina                                                                         | cam  |
| Canola                                                                           | can  |
| Chickpeas/garbanzo                                                               | grb  |
| Fruit                                                                            | frt  |
| GMOs/genetically engineered crops/transgenic crops                               | gmo  |



|                             |      |
|-----------------------------|------|
| Grain                       | grn  |
| Hay/forage                  | hay  |
| Lentils                     | len  |
| Peas                        | Pea  |
| Nutritive value             | nut  |
| Pulse                       | pls  |
| Oilseed                     | oil  |
| Safflower                   | saf  |
| Locally grown/Montana grown | mtg  |
| Seeds                       | seed |
| Vegetables                  | veg  |
| Wheat                       | wht  |
| Pasture                     | pst  |

|                                               |      |
|-----------------------------------------------|------|
|                                               |      |
| <u>Production, preparation and costs</u>      | ppc  |
| Crop rotations                                | cr   |
| Transportation/shipping                       | trns |
| Processing                                    | proc |
| Crop Diversity                                | cdvt |
| Overhead                                      | ohd  |
| Inputs                                        | ipts |
|                                               |      |
| <u>Social</u>                                 | soc  |
| Education                                     | edu  |
| Promotion and Advertising                     | adv  |
| Collaboration (e.g., unions and cooperatives) | coll |

|                  |       |
|------------------|-------|
| sustainability   | sust  |
|                  |       |
| <u>Geography</u> | geo   |
| Climate change   | clch  |
| Hub location     | hub   |
| Market location  | mkt   |
|                  |       |
| Other            | other |
| None needed      | none  |

*Question: What are your experiences with no-till?*

| <b>Domains and subdomains</b>                                              | <b>Codes</b> |
|----------------------------------------------------------------------------|--------------|
| <u>Duration:</u> (write none or yes along with duration if given, or want- | dur          |
| 0/no                                                                       | none         |

|                                                                                         |       |
|-----------------------------------------------------------------------------------------|-------|
| 1-5                                                                                     | short |
| 6-10                                                                                    | mod   |
| 11 or more                                                                              | long  |
| Yes                                                                                     | yes   |
| Not truly no till. 'limited till/minimum till                                           | ltill |
| No, but want to try                                                                     | want  |
|                                                                                         |       |
| <u>Experience</u>                                                                       | exp   |
| Positive                                                                                | pos   |
| Good but depends                                                                        | dep   |
| Negative                                                                                | neg   |
| Temporal dependence (e.g., if it becomes easier through time to manage no-till acreage) | temp  |
| Not feasible                                                                            | nofe  |

|                                                                      |      |
|----------------------------------------------------------------------|------|
|                                                                      |      |
| <u>Abiotic</u>                                                       | abio |
| Improved soil (unspecified)                                          | soil |
| Soil moisture                                                        | mois |
| Erosion                                                              | eros |
| Alters soil chemistry (pH, nutrients, CEC, example-N immobilization) | chem |
| Soil texture                                                         | text |
| Climate                                                              | clim |
|                                                                      |      |
| <u>Economics</u>                                                     | ec   |
| Time                                                                 | tim  |
| Costs (e.g., requires more fertilizer thus higher input costs)       | cost |
| Changes yield                                                        | yld  |

|                                                                                                        |       |
|--------------------------------------------------------------------------------------------------------|-------|
| Equipment constraints                                                                                  | equip |
|                                                                                                        |       |
| <u>Pest management</u>                                                                                 | pest  |
| Community (changes in the relative abundance of species e.g., more <i>Cirsium</i> less <i>Bromus</i> ) | comm  |
| Insect pressure                                                                                        | inse  |
| Disease pressure                                                                                       | dise  |
| Weed pressure (dominance of weeds)                                                                     | weed  |
| Annual weeds                                                                                           | annu  |
| Perennial weeds                                                                                        | pere  |
| Canada thistle                                                                                         | ciar  |
| Cheatgrass                                                                                             | brte  |
| Wild oat                                                                                               | avfa  |
| Narrowleaf hawksbeard                                                                                  | crte  |

|                                          |      |
|------------------------------------------|------|
| Evolved pesticide resistance             | evol |
|                                          |      |
| Management                               | man  |
| Seasonality (eg requires later planting) | seas |
| Crop residue                             | resi |
| Herbicide                                | herb |
| Fertilizer                               | fert |
| Fungicide                                | fung |
| Dryland                                  | dry  |
| Irrigation                               | irr  |
| Organic products (or lack thereof)       | org  |
| Large acreage/size concerns              | size |
|                                          |      |

|                                              |     |
|----------------------------------------------|-----|
| <u>Social</u>                                | soc |
| More to learn/need more educational outreach | edu |

**Question: What research do you feel would be the most beneficial to your operation?**

| <b>Domains and subdomains</b>                           | <b>Codes</b> |
|---------------------------------------------------------|--------------|
| <u>Specific pest</u>                                    | pst          |
| Lepidoptera noctuidae (cutworm, armyworm, lantern moth) | leno         |
| Wireworm                                                | wire         |
| Orange midge                                            | om           |
| Wheat midge                                             | whmd         |
| Wheat stem sawfly                                       | saw          |
| Pest                                                    | pst          |
| Nematode                                                | nem          |
| Insect pest                                             | pest         |



|                                                       |      |
|-------------------------------------------------------|------|
| Perennial weeds                                       | pern |
| Weeds                                                 | weed |
| Noxious weeds (those that are state listed)           | nox  |
| Russian thistle ( <i>Salsola kali</i> )               | rus  |
| Narrowleaf hawksbeard ( <i>Crepis tectorum</i> )      | nlh  |
| Wild oat ( <i>Avena fatua</i> )                       | woat |
| Kochia ( <i>Kochia scoparia</i> )                     | kosc |
| Spotted knapweed ( <i>Centaurea stoebe</i> )          | cest |
| Pigeon grass/green foxtail ( <i>Setaria viridis</i> ) | sevi |
| Pathogens                                             | path |
| Pesticide resistance (weeds, insects, fungi etc.)     | rest |
| Wheat curl mite                                       | wcm  |
| Cheatgrass, downy brome ( <i>Bromus tectorum</i> )    | brte |

|                                                                                  |      |
|----------------------------------------------------------------------------------|------|
| Canada/creeping thistle ( <i>Cirsium arvense</i> )                               | ciar |
| Jointed goat grass ( <i>Aegilops cylindrica</i> )                                | aecy |
| Field pennycress/fanweed ( <i>Thlaspi arvense</i> )                              | thar |
| Quackgrass ( <i>Elymus repens</i> )                                              | elre |
| Field bindweed/morning glory/creeping jenny ( <i>Convolvulus arvensis</i> )      | coav |
|                                                                                  |      |
| <u>Beneficial associated biodiversity (biocontrol, pollinators, mycorrhizae)</u> | ben  |
| Pollinators                                                                      | pol  |
| Carabid beetles                                                                  | beet |
| Natural enemies (i.e., predators and parasitoids)                                | par  |
| Ecosystem services                                                               | ecos |
| Classical biocontrol agents                                                      | bioc |
|                                                                                  |      |

|                                                       |       |
|-------------------------------------------------------|-------|
| <u>Abiotic environment</u>                            | aben  |
| Soil tilth (soil health)                              | tilt  |
| Leaching/pollution                                    | leach |
| Climatic factors                                      | clim  |
| Watershed                                             | wshd  |
| Erosion                                               | ers   |
| Spatial heterogeneity                                 | sph   |
|                                                       |       |
| <u>Plant biology and ecophysiology</u>                | phy   |
| N use efficiency                                      | nuse  |
| Crop performance                                      | crp   |
| Nutritive values                                      | ntrt  |
| Water balance (water use efficiency, water potential) | wat   |

|                                                     |      |
|-----------------------------------------------------|------|
| Allelopathy/chemical ecology                        | alp  |
| Biological nitrogen fixation                        | fix  |
| Phenology                                           | phen |
|                                                     |      |
| Inputs                                              | inpt |
| Fungicide foliar                                    | funf |
| Fungicide seed                                      | funs |
| Herbicide                                           | her  |
| Chem fallow                                         | chfa |
| Growth stimulators                                  | grst |
| Non-fertilizer soil amendments (including composts) | nof  |
| Input reduction                                     | red  |
| Miscellaneous/unspecified inputs                    | inpu |

|                                                        |       |
|--------------------------------------------------------|-------|
| Fertilizers                                            | fert  |
| Residue                                                | resi  |
|                                                        |       |
| <u>Agronomy</u>                                        | agro  |
| Livestock                                              | liv   |
| Cover crops                                            | cov   |
| Crop rotation                                          | rot   |
| Intercropping                                          | inter |
| Fallowing                                              | fall  |
| Converting to organic                                  | org   |
| Tillage                                                | til   |
| Season extension (e.g., hoop houses, greenhouse, etc.) | sext  |
| No till/reduced till                                   | ntil  |

|                                              |      |
|----------------------------------------------|------|
| Seed bed prep                                | sbp  |
| Integrated pest management                   | ipm  |
| Irrigation                                   | irr  |
| Management system/cropping systems           | mgt  |
| Yields/net return                            | yld  |
| Crop residue management                      | crm  |
| Timing of application (including thresholds) | tim  |
|                                              |      |
| <u>Precision Agriculture</u>                 | prag |
| Remote imagery                               | rim  |
| GPS and mapping                              | gps  |
| Application equipment                        | app  |
|                                              |      |

|                         |     |
|-------------------------|-----|
| <u>Specialty</u>        | spc |
| Alternative crops       | alt |
| Asparagus               | asp |
| Cabbage                 | cab |
| Fruit tree              | fru |
| Micros                  | mic |
| Onions                  | oni |
| Pepper                  | pep |
| Quinoa                  | qui |
| GMO                     | gmo |
| Squash                  | squ |
| Tomato                  | tom |
| Vegetable/horticultural | veg |

|                                              |      |
|----------------------------------------------|------|
| Potatoes (alternative for grower's location) | pot  |
| Sugarbeets                                   | bevu |
| Varieties                                    | var  |
| Miscellaneous roots and tubers               | root |
| Lamb                                         | lmb  |
|                                              |      |
| <u>Forage</u>                                | frg  |
| Unspecified forage                           | ufrg |
| Alfalfa                                      | alf  |
| Annual forage                                | afor |
| Forage kochia ( <i>Bassia prostrata</i> )    | fkoc |
| Timothy                                      | phpl |
| Feed/hay barley                              | fbar |



|                                                                  |      |
|------------------------------------------------------------------|------|
|                                                                  |      |
| <u>Grain</u>                                                     | grn  |
| Cereals                                                          | crl  |
| Rye                                                              | rye  |
| Wheat                                                            | wht  |
| Varieties                                                        | var  |
| Pulse (legumes)                                                  | pls  |
| Pulse (generic and unspecified)                                  | pulg |
| Soy                                                              | soy  |
| Chickpea                                                         | chic |
| Mung beans                                                       | mun  |
| Clover and sweetclover ( <i>Trifolium</i> and <i>Melilotus</i> ) | clv  |
| Lentils                                                          | lecu |

|                                        |      |
|----------------------------------------|------|
| Peas                                   | pea  |
|                                        |      |
| <u>Oilseed crops</u>                   | oil  |
| Mustard                                | mus  |
| Flax                                   | flax |
| Safflower                              | saf  |
| Sunflower ( <i>Helianthus annuus</i> ) | hean |
| Unspecified                            | unsp |
|                                        |      |
| <u>Marketing and Economics</u>         | mkt  |
| Revenue streams/specific markets       | rv   |
| Geography                              | geo  |
| Social/advertisement                   | soc  |

|                                |     |
|--------------------------------|-----|
| Production, preparation & cost | prd |
|--------------------------------|-----|

*Question: Where do you get your farming information?*

| <b>Domains and subdomains</b>       | <b>Codes</b> |
|-------------------------------------|--------------|
| Personal communication              | prc          |
| Neighbors/fellow farmers/colleagues | nei          |
| Coffee shops                        | cof          |
| Consultants                         | Con          |
| Suppliers (big ag, chem companies)  | Sup          |
| Family                              | Fam          |
| Trial and error/personal experience | Tae          |
|                                     |              |
| <u>Media</u>                        | Med          |
| Journals (assuming peer reviewed)   | jou          |

|                                            |      |
|--------------------------------------------|------|
| Internet (unspecific)                      | web  |
| Periodicals (magazines, newspapers)        | per  |
| TV/radio                                   | tvr  |
| Miscellaneous publications                 | misc |
|                                            |      |
| <u>Extension/University</u>                | eu   |
| Electronic alerts                          | aga  |
| Technical Bulletins                        | mtg  |
| Agents                                     | age  |
| Demonstrations including field days, tours | demo |
| Workshops                                  | wsh  |
| General extension material/support         | ext  |
| Faculty                                    | fac  |

|                                                                                |       |
|--------------------------------------------------------------------------------|-------|
| Research station                                                               | sta   |
|                                                                                |       |
| <u>Agency/trade groups (NRCS, MWBC, ARS, APHIS, Soil and water con groups)</u> | agcy  |
| Miscellaneous meetings/workshops                                               | agmis |
| Agency publications                                                            | agpub |

***Question: Please describe any on-farm research you are conducting?***

| <b>Domains and subdomains</b> | <b>Codes</b> |
|-------------------------------|--------------|
| Specific pest                 | pst          |
| Orange midge                  | om           |
| Wheat midge                   | whmd         |
| Wheat stem sawfly             | saw          |
| Pest                          | pst          |
| Nematode                      | nem          |

|                                                                                  |      |
|----------------------------------------------------------------------------------|------|
| Insect pest                                                                      | pest |
| Weeds                                                                            | weed |
| Noxious weeds (those that are state listed)                                      | nox  |
| Russian thistle                                                                  | rus  |
| Narrowleaf hawksbeard                                                            | nlh  |
| Wild oat                                                                         | woat |
| Kochia ( <i>Kochia scoparia</i> )                                                | kosc |
| Spotted knapweed ( <i>Centaurea stoebe</i> )                                     | cest |
| Pigeon grass/green foxtail ( <i>Setaria viridis</i> )                            | sevi |
| Pathogens                                                                        | path |
|                                                                                  |      |
| <u>Beneficial associated biodiversity (biocontrol, pollinators, mycorrhizae)</u> | ben  |
| Pollinators                                                                      | pol  |

|                                                   |       |
|---------------------------------------------------|-------|
| Carabid beetles                                   | beet  |
| Natural enemies (i.e., predators and parasitoids) | par   |
| Classical biocontrol agents                       | bioc  |
|                                                   |       |
| Abiotic environment                               | aben  |
| Soil tilth (soil health)                          | tilt  |
| N leaching                                        | leach |
| Climatic factors                                  | clim  |
| Watershed                                         | wshd  |
|                                                   |       |
| <u>Plant biology and ecophysiology</u>            | phy   |
| N use efficiency                                  | nuse  |
| Crop performance                                  | crp   |

|                                                      |      |
|------------------------------------------------------|------|
| Nutritive values                                     | ntrt |
|                                                      |      |
| <u>Inputs</u>                                        | inpt |
| Fungicide foliar                                     | funf |
| Fungicide seed                                       | funs |
| Herbicide                                            | her  |
| Chem fallow                                          | chfa |
| Growth stimulators                                   | grst |
| Non-fertilizer soil ammendments (including composts) | nof  |
| Fertilizers                                          | fert |
|                                                      |      |
| <u>Agronomy</u>                                      | agro |
| Livestock                                            | liv  |



|                                                        |       |
|--------------------------------------------------------|-------|
| Cover crops                                            | cov   |
| Crop rotation                                          | rot   |
| Intercropping                                          | inter |
| Fallowing                                              | fall  |
| Converting to organic                                  | org   |
| Tillage                                                | til   |
| season extension (e.g., hoop houses, greenhouse, etc.) | sext  |
| No till/reduced till                                   | ntil  |
| Seed bed prep                                          | sbp   |
| Integrated pest management                             | ipm   |
| Irrigation                                             | irr   |
| Management system/cropping systems                     | mgt   |
| Yields/net return                                      | yld   |

|                              |      |
|------------------------------|------|
|                              |      |
| <u>Precision Agriculture</u> | prag |
| Remote imagery               | rim  |
| GPS and mapping              | gps  |
| Application equipment        | app  |
|                              |      |
| <u>Specialty</u>             | spc  |
| Alternative crops            | alt  |
| Asparagus                    | asp  |
| Cabbage                      | cab  |
| Fruit tree                   | fru  |
| Micros                       | mic  |
| Onions                       | oni  |

|                                              |      |
|----------------------------------------------|------|
| Pepper                                       | pep  |
| Quinoa                                       | qui  |
| GMO                                          | gmo  |
| Squash                                       | squ  |
| Tomato                                       | tom  |
| Vegetable/horticultural                      | veg  |
| Potatoes (alternative for grower's location) | pot  |
| Sugarbeets                                   | bevu |
| Varieties                                    | var  |
|                                              |      |
| <u>Forage</u>                                | frg  |
| Alfalfa                                      | alf  |
| Annual forage                                | afor |

|                                           |      |
|-------------------------------------------|------|
| Forage kochia ( <i>Bassia prostrata</i> ) | fkoc |
| Timothy ( <i>Phleum pratense</i> )        | tim  |
|                                           |      |
| <u>Grain</u>                              | grn  |
| Barley                                    | bar  |
| Herbicide resistant                       | hbre |
| Cereals                                   | crl  |
| Wheat                                     | wht  |
|                                           |      |
| <u>Pulse and legumes</u>                  | pls  |
| Pulse (generic and unspecified)           | pulg |
| Soy                                       | soy  |
| Chickpea                                  | chic |

|                      |      |
|----------------------|------|
| Mung beans           | mun  |
| Peas                 | pea  |
|                      |      |
| <u>Oilseed crops</u> | oil  |
| Mustard              | mus  |
| Flax                 | flax |
